# Supplementary material for: Active and inactive β1 integrins segregate into distinct nanoclusters in focal adhesions
Source: PubMed Central journal article supplement — J Cell Biol. 2018 Jun 4;217(6):1929–40. doi: 10.1083/jcb.201707075 (PMC5987715; doi:10.1083/jcb.201707075), 2018-06-04
Supplement: JCB_201707075_sm.pdf [file JCB_201707075_sm.pdf]

## Supplemental material

Spiess et al., <https://doi.org/10.1083/jcb.201707075>

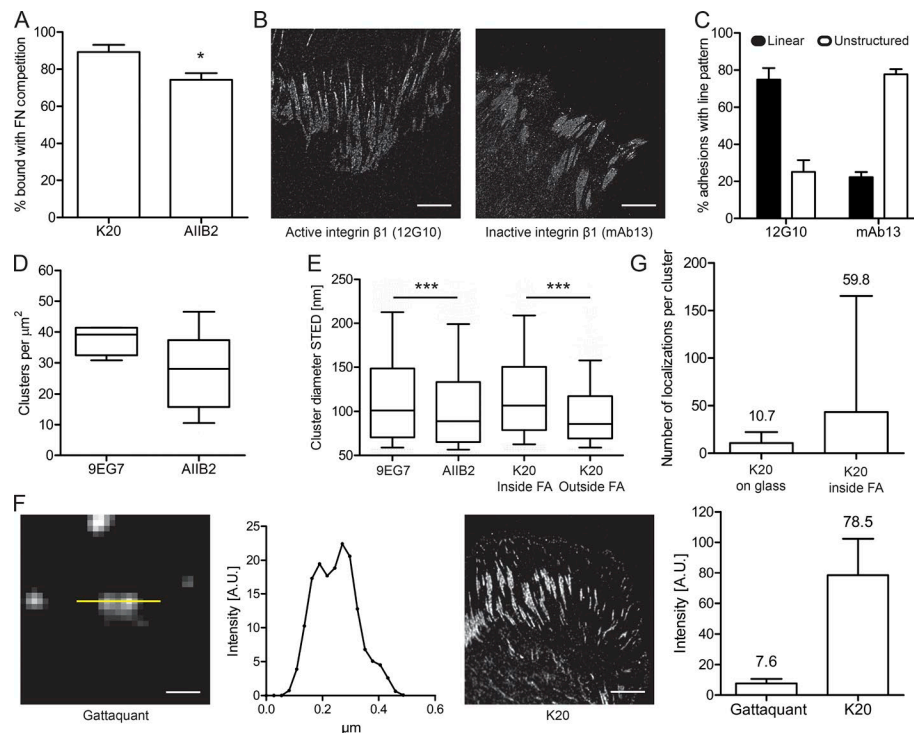

**Figure S1. Ab characterization and colocalization controls. (A)** AIB2 recognizes a LABS. The percentage of AIB2 bound to Hs578T cells preincubated with recombinant human fibronectin (FN) domain-10 compared with untreated cells was determined by FACS. The bars show medians  $\pm$  SEM among four independent experiments. **(B)** Representative STED image of an Hs578T cell stained with anti- $\beta$ 1 (active  $\beta$ 1) integrin mAb 12G10 (rhodamine) or anti- $\beta$ 1 (inactive  $\beta$ 1) integrin mAb 13. **(C)** Manual scoring of individual adhesions for linear or unstructured patterns. The bars show the mean percentages ( $\pm$  SEM) of FAs displaying linear versus unstructured patterns for stainings using mAbs 12G10 ( $n = 10$  images) and mAb 13 ( $n = 10$  images). **(D)** Cluster density within FAs of STORM images labeled with mAb 9EG7 for active ( $n = 4$  images) and mAb AIB2 for inactive ( $n = 13$  images)  $\beta$ 1 integrins. The bars show the median cluster density with quartile distribution in boxes and whiskers for decile distribution. **(E)** Cluster size of STORM images of mAb 9EG7 ( $n = 14$  images) and mAb AIB2 ( $n = 14$  images) labeling of active and inactive  $\beta$ 1 integrins within FAs as well as mAb K20 labeling of total  $\beta$ 1 integrins inside and outside FAs ( $n = 10$  images). The bars show the median cluster size with quartile distribution in boxes and whiskers for decile distribution.  $t$  test: \*,  $P \leq 0.05$ ; \*\*\*,  $P \leq 0.001$ . **(F)** Far left: Representative STED image of the customized Gattaquant sample ( $n = 3$  images). Center left: Intensity quantification along the yellow line in the Gattaquant sample. Center right: Representative STED image of an Hs578T cell stained with anti- $\beta$ 1 (total  $\beta$ 1) integrin mAb K20 acquired with the same settings used for imaging the Gattaquant sample (OG488 label). Far right: Gattaquant-based STED-detected cluster intensity determination. Intensities of 50-nm-large regions of interest drawn on Gattaquant sample labeling locations of representative STED images were analyzed ( $n = 120$  clusters) and compared with intensities of similarly large regions of interest drawn in representative STED images of K20 cell-staining nanoclusters ( $n = 120$  clusters). Bars, 5  $\mu\text{m}$ . **(G)** The number of localizations per cluster of STORM images of mAb K20 adsorbed on glass ( $n = 2$  images) is smaller than the number of localizations per cluster of STORM images of mAb K20 ( $n = 6$  images)-labeled total  $\beta$ 1 integrins within FAs. **(F and G)** Bars show the mean numbers ( $\pm$  SD) with mean values above.

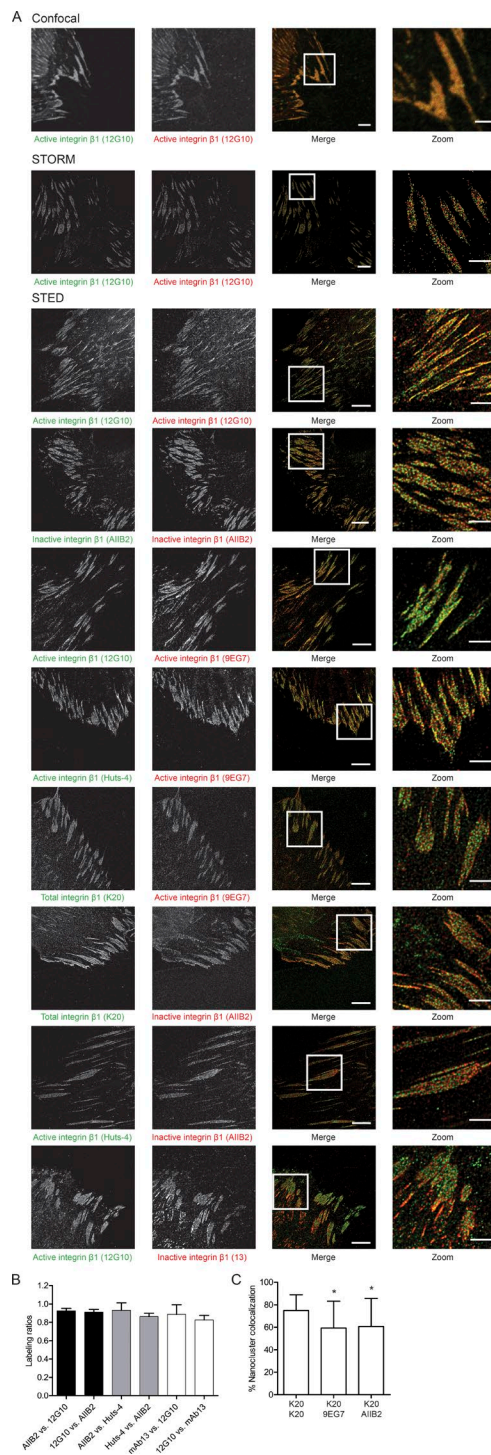

**Figure S2. Total, active, and inactive  $\beta 1$  integrin localization within FAs. (A)** Representative confocal, STED, and STORM images of Hs578T cells stained using mAb 12G10 and two differently colored secondary abs, both targeting mAb 12G10 (top three rows). Next rows: Representative STED images of Hs578T cells costained with anti- $\beta 1$  (active  $\beta 1$ ) integrin mAb 12G10 (OG488) and anti- $\beta 1$  (active  $\beta 1$ ) integrin mAb 9EG7 (rhodamine); anti- $\beta 1$  (active  $\beta 1$ ) integrin mAb Huts-4 (OG488) and anti- $\beta 1$  (active  $\beta 1$ ) integrin mAb 9EG7 (rhodamine); anti- $\beta 1$  (total  $\beta 1$ ) integrin mAb K20 (OG488) and anti- $\beta 1$  (active  $\beta 1$ ) integrin mAb 9EG7 (rhodamine); anti- $\beta 1$  (total  $\beta 1$ ) integrin mAb 12G10 (OG488) and anti- $\beta 1$  (inactive  $\beta 1$ ) integrin mAb A1IB2 (rhodamine); anti- $\beta 1$  (active  $\beta 1$ ) integrin mAb Huts-4 (OG488) and anti- $\beta 1$  (inactive  $\beta 1$ ) integrin mAb A1IB2 (rhodamine); and anti- $\beta 1$  (active  $\beta 1$ ) integrin mAb 12G10 (OG488) and anti- $\beta 1$  (inactive  $\beta 1$ ) integrin mAb 13 (rhodamine). The white boxes indicate the zoomed regions. Bars: (main images) 5  $\mu\text{m}$ ; (insets) 2  $\mu\text{m}$ . **(B)** Anti- $\beta 1$  integrin mAbs used in this study did not compete for ligand binding. The bars show the ratio of the background-corrected median intensities ( $\pm$  SEM;  $n = 3$  experiments) of Hs578T cells labeled with the single mAb indicated first under each bar in the presence of the second mAb indicated, divided by the single labeling of the first mAb alone. **(C)** Percentage of overlapping nanoclusters defined by intensity peaks within adhesions in STED images of Hs578T cells costained with mAb K20 and mAb 9EG7 ( $n = 12$  images) or mAb A1IB2 ( $n = 8$  images). Hs578T cells stained using mAb K20, and two differently colored secondary abs targeting both mAb K20 were used as controls for maximal percentage of overlap ( $n = 9$  images). The bars show the mean percentages ( $\pm$  SD). *t* test: \*,  $P \leq 0.05$ .

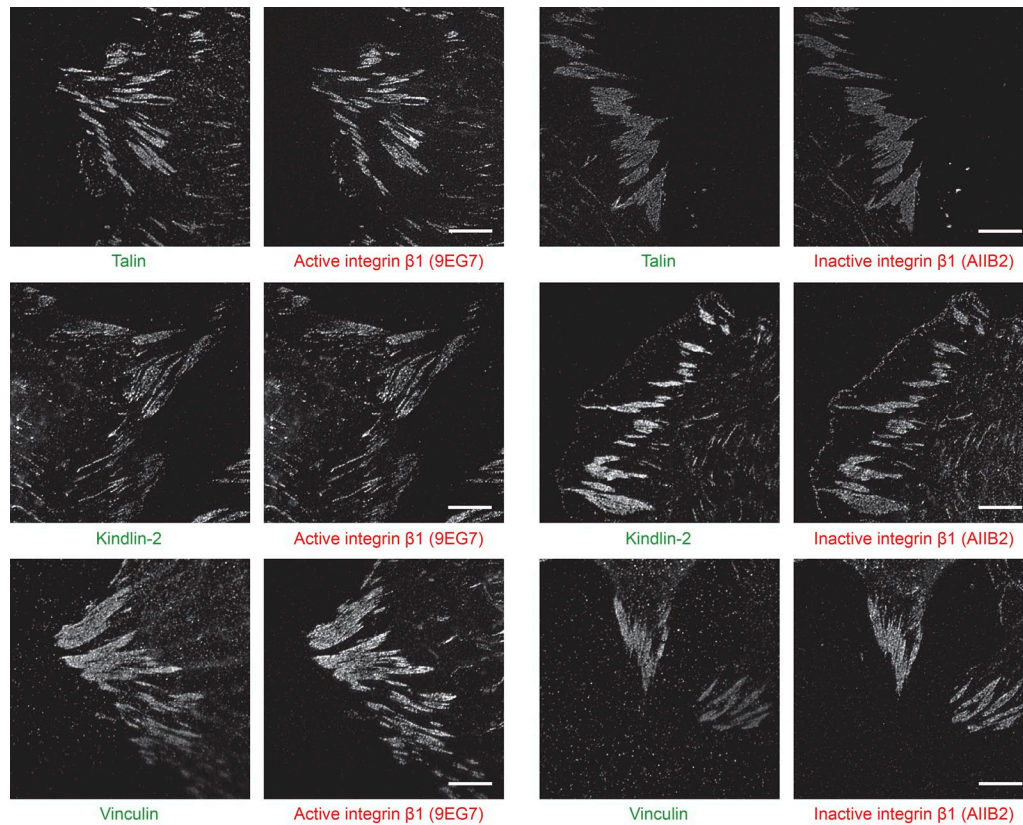

Figure S3. **Individual channels of STED colocalization images.** Left: Representative STED images of Hs578T cells costained with anti- $\beta 1$  (active  $\beta 1$ ) integrin mAb 9EG7 (rhodamine) and antitalin mAb (OG488), anti-kindlin-2 polyclonal ab (OG488), and antivinculin polyclonal ab (OG488). Right: Representative STED images of Hs578T cells costained with anti- $\beta 1$  (inactive  $\beta 1$ ) integrin mAb A1B2 (rhodamine) and antitalin mAb (OG488), anti-kindlin-2 polyclonal ab (OG488), and antivinculin polyclonal ab (OG488). Bars, 5  $\mu\text{m}$ .
